# Supplementary material
Source: HighWire-hosted journal article supplement (https://ez-admanager.com/highwire/filestream/135911/field_highwire_adjunct_files/0/koga_404.pdf)
Supplement: koga_404.pdf [file koga_404.pdf]

# MSA를 가장한 DLB, PD 그리고 PSP

134명 환자의 부검 연구

When DLB, PD, and PSP masquerade as MSA

An autopsy study of 134 patients

Shunsuke Koga, MD  
Naoya Aoki, MD  
Ryan J. Uitti, MD  
Jay A. van Gerpen, MD  
William P. Cheshire, MD  
Keith A. Josephs, MD  
Zbigniew K. Wszolek, MD  
J. William Langston, MD  
Dennis W. Dickson, MD

**목적:** 다계통위축증(multiple system atrophy, MSA) 진단의 정확성을 높일 수 있는 방법을 찾기 위해, 생전에 MSA로 진단 받은 환자 중 부검을 시행한 환자들의 진단 과정을 평가했다. 부검에 의한 MSA 진단 확인 여부에 따라 환자를 분류하고, 그들의 임상적 병리학적 소견을 비교 분석하였다.

**방법:** 본 연구는 생전에 MSA로 진단 받고, 사후에 부검 및 신경병리학적 검사를 시행한 134명의 환자 자료를 후향적으로 분석하였다. 134명 중 125명이 분석 가능할 정도의 충분한 의무 기록을 가지고 있었다. 부검에서 MSA로 확인된 환자와 그렇지 않은 환자들(루이소체 치매[dementia with Lewy bodies, DLB], 파킨슨병[Parkinson disease, PD], 진행 핵상 마비[progressive supranuclear palsy, PSP])로 나누어 임상적, 병리학적 소견들을 비교하였다.

**결과:** 임상적으로 MSA로 진단된 134명 중 83명(62%)이 부검에서도 같은 질환으로 판명되었다. 병리학적 DLB가 가장 흔한 잘못된 진단이었고, 이어서 PSP와 PD가 많았다. 몇몇 DLB 환자들은 부검 소견이 DLB의 병리학적 진단 기준을 만족시킴(intermediate to high likelihood of DLB)에도 불구하고 치매 증상을 나타내지 않았다. 유의미한 알츠하이머-형태의 병리학 소견을 보인 환자는 없었다. 자율신경계 증상이 DLB와 PD를 MSA로 오진하는 가장 큰 이유였고, 소뇌성 실조가 PSP에서의 오진의 가장 큰 이유였다.

**결론:** 본 부검 연구에서 MSA 진단의 정확성은 좋지 않았다. 병리학적 분석을 해 본 결과, DLB, PD, PSP가 MSA처럼 보일 수 있는 가장 흔한 질환들이었다. 이 결과는 환자 치료뿐만 아니라 병리학적 확진을 병행하지 않은 MSA 환자를 이용한 연구들에 있어서도 중요한 의미를 가진다.

Neurology® 2015;85:404-412

Figure Flow chart of study design

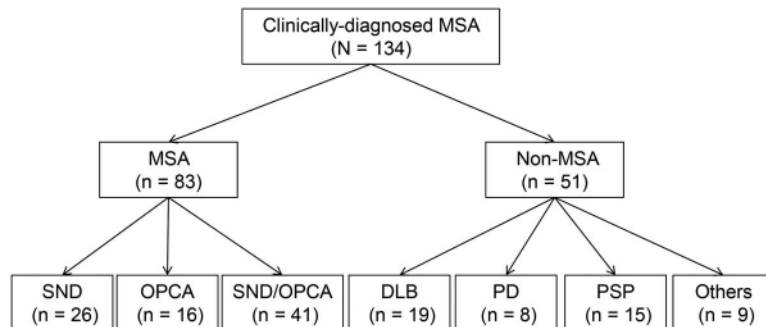

DLB = dementia with Lewy bodies; MSA = multiple system atrophy; PD = Parkinson disease; PSP = progressive supranuclear palsy; OPCA = predominantly olivopontocerebellar involvement type of multiple system atrophy; SND = predominantly striatonigral involvement type of multiple system atrophy; SND/OPCA = equally severe striatonigral and olivopontocerebellar involvement type of multiple system atrophy.
